# Supplementary material for: Changes in Periodic Limb Movements of Sleep After the Use of Continuous Positive Airway Pressure Therapy: A Meta-Analysis
Source: PubMed Central journal article supplement (PMC9202316; doi:10.3389/fneur.2022.817009), 2022-06-02
Supplement: Presentation_1.pdf [file Presentation_1.pdf]

# Regression of Difference in means on female (%)

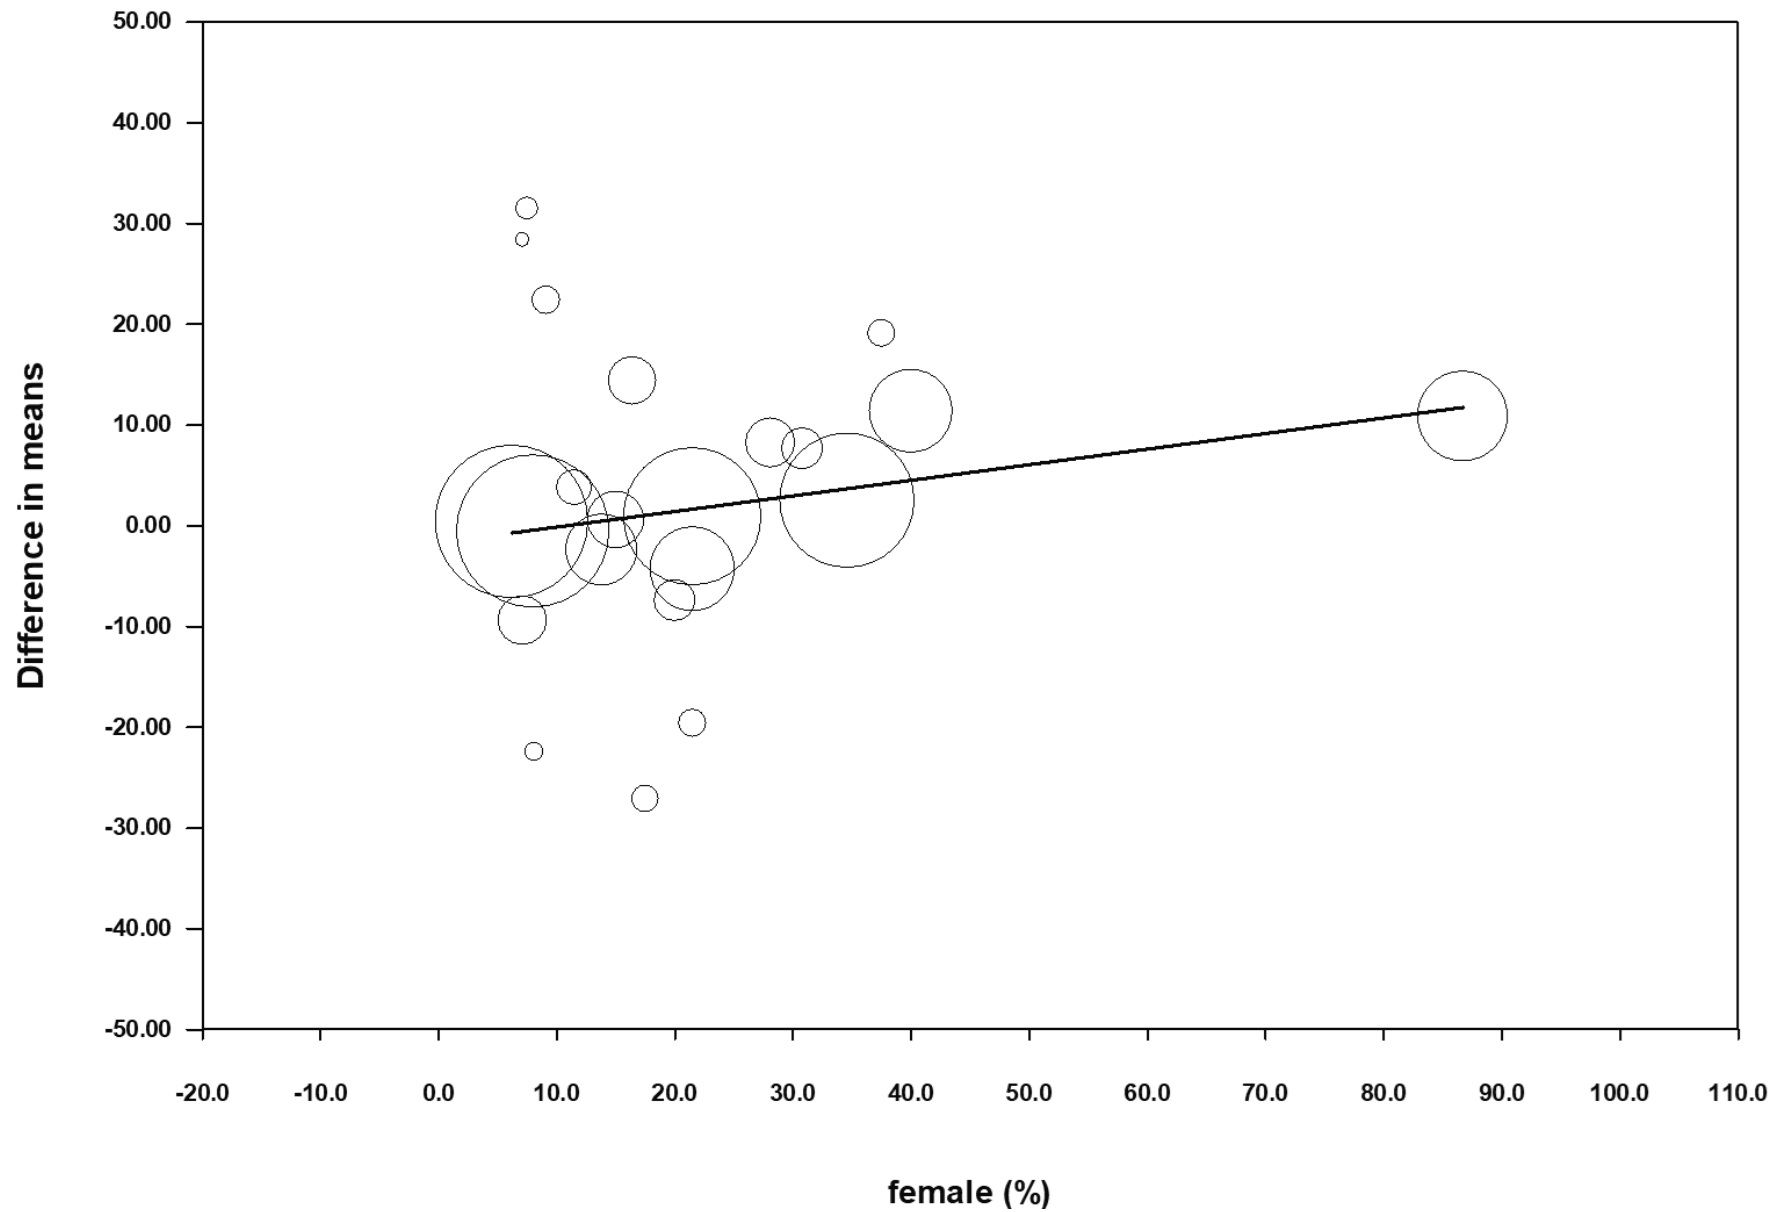

eFigure 1A meta-regression between changes of PLMI and female proportion

# Regression of Difference in means on AHI before Tx

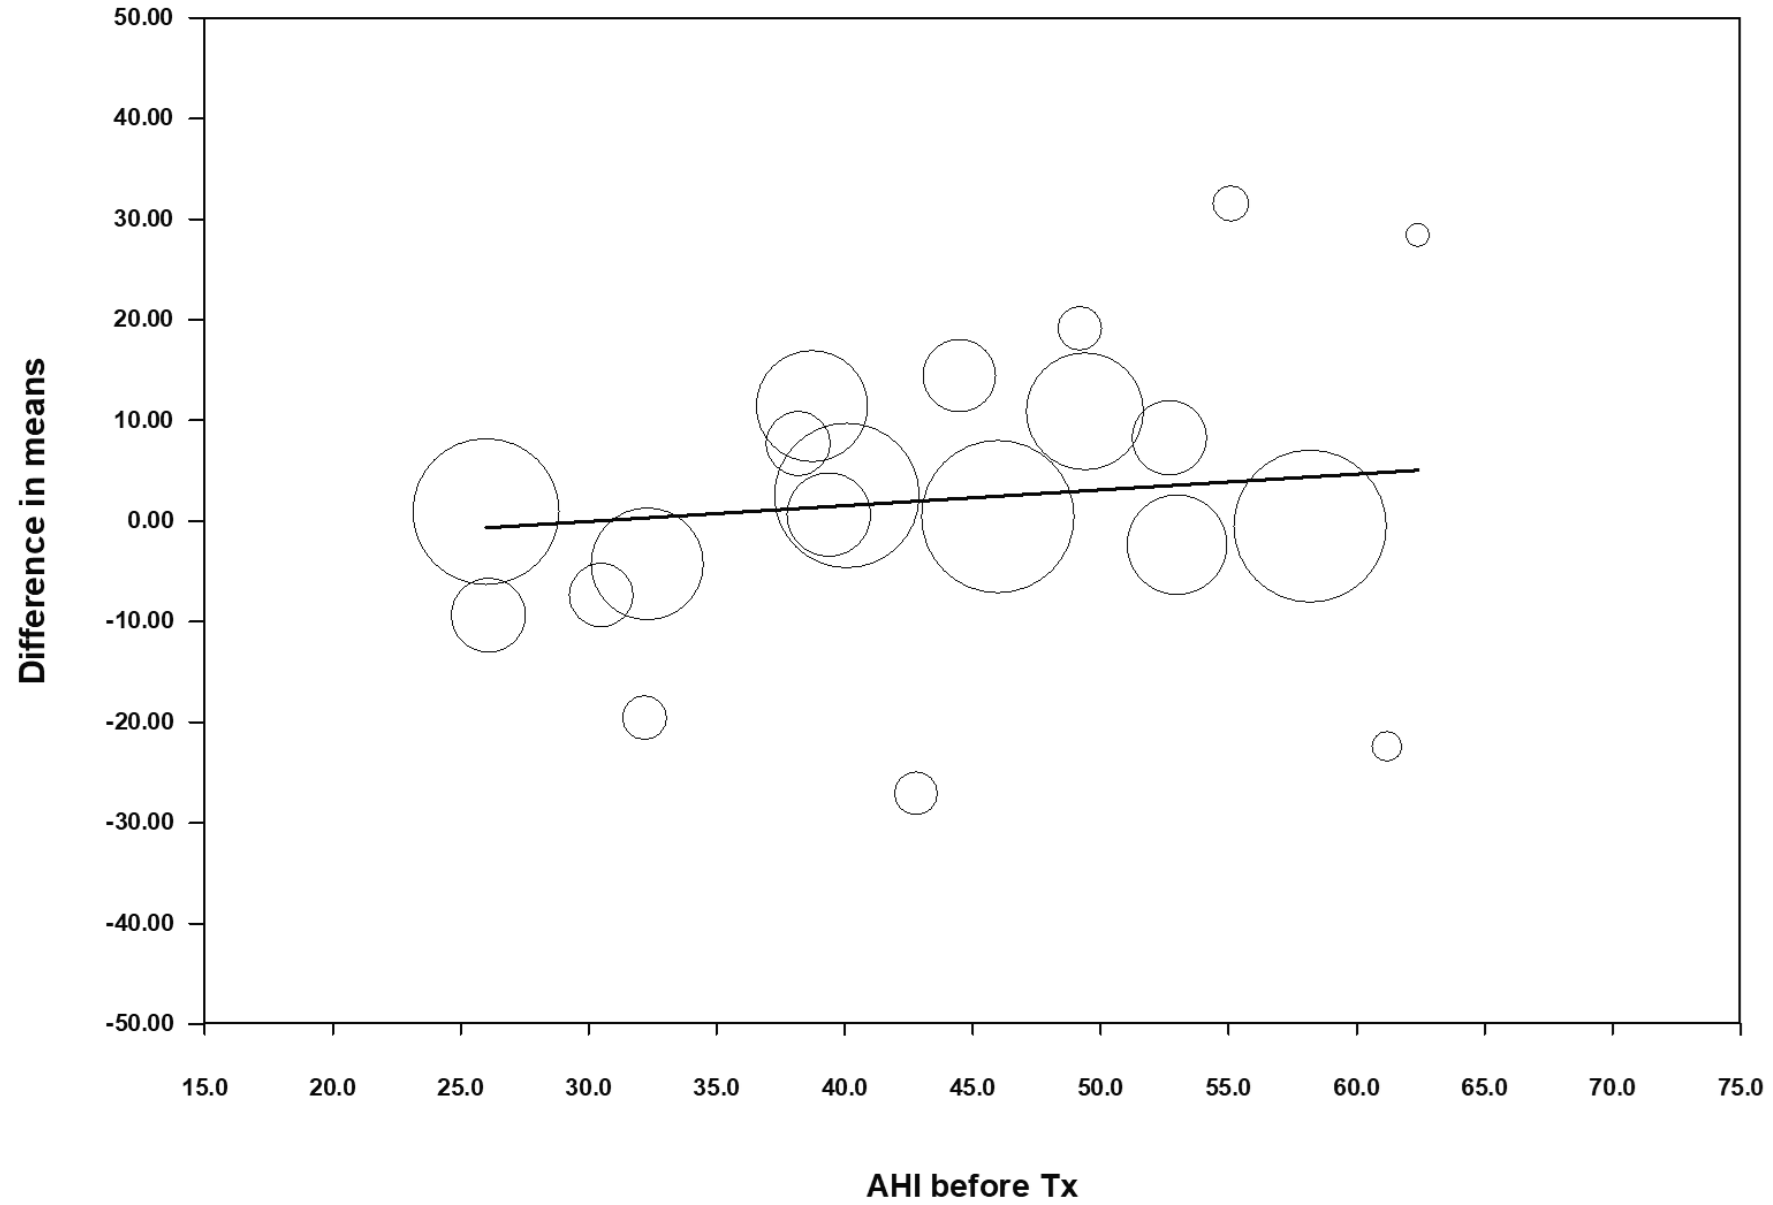

eFigure 1B meta-regression between changes of PLMI and baseline AHI

# Regression of Difference in means on Arousal Index before Tx

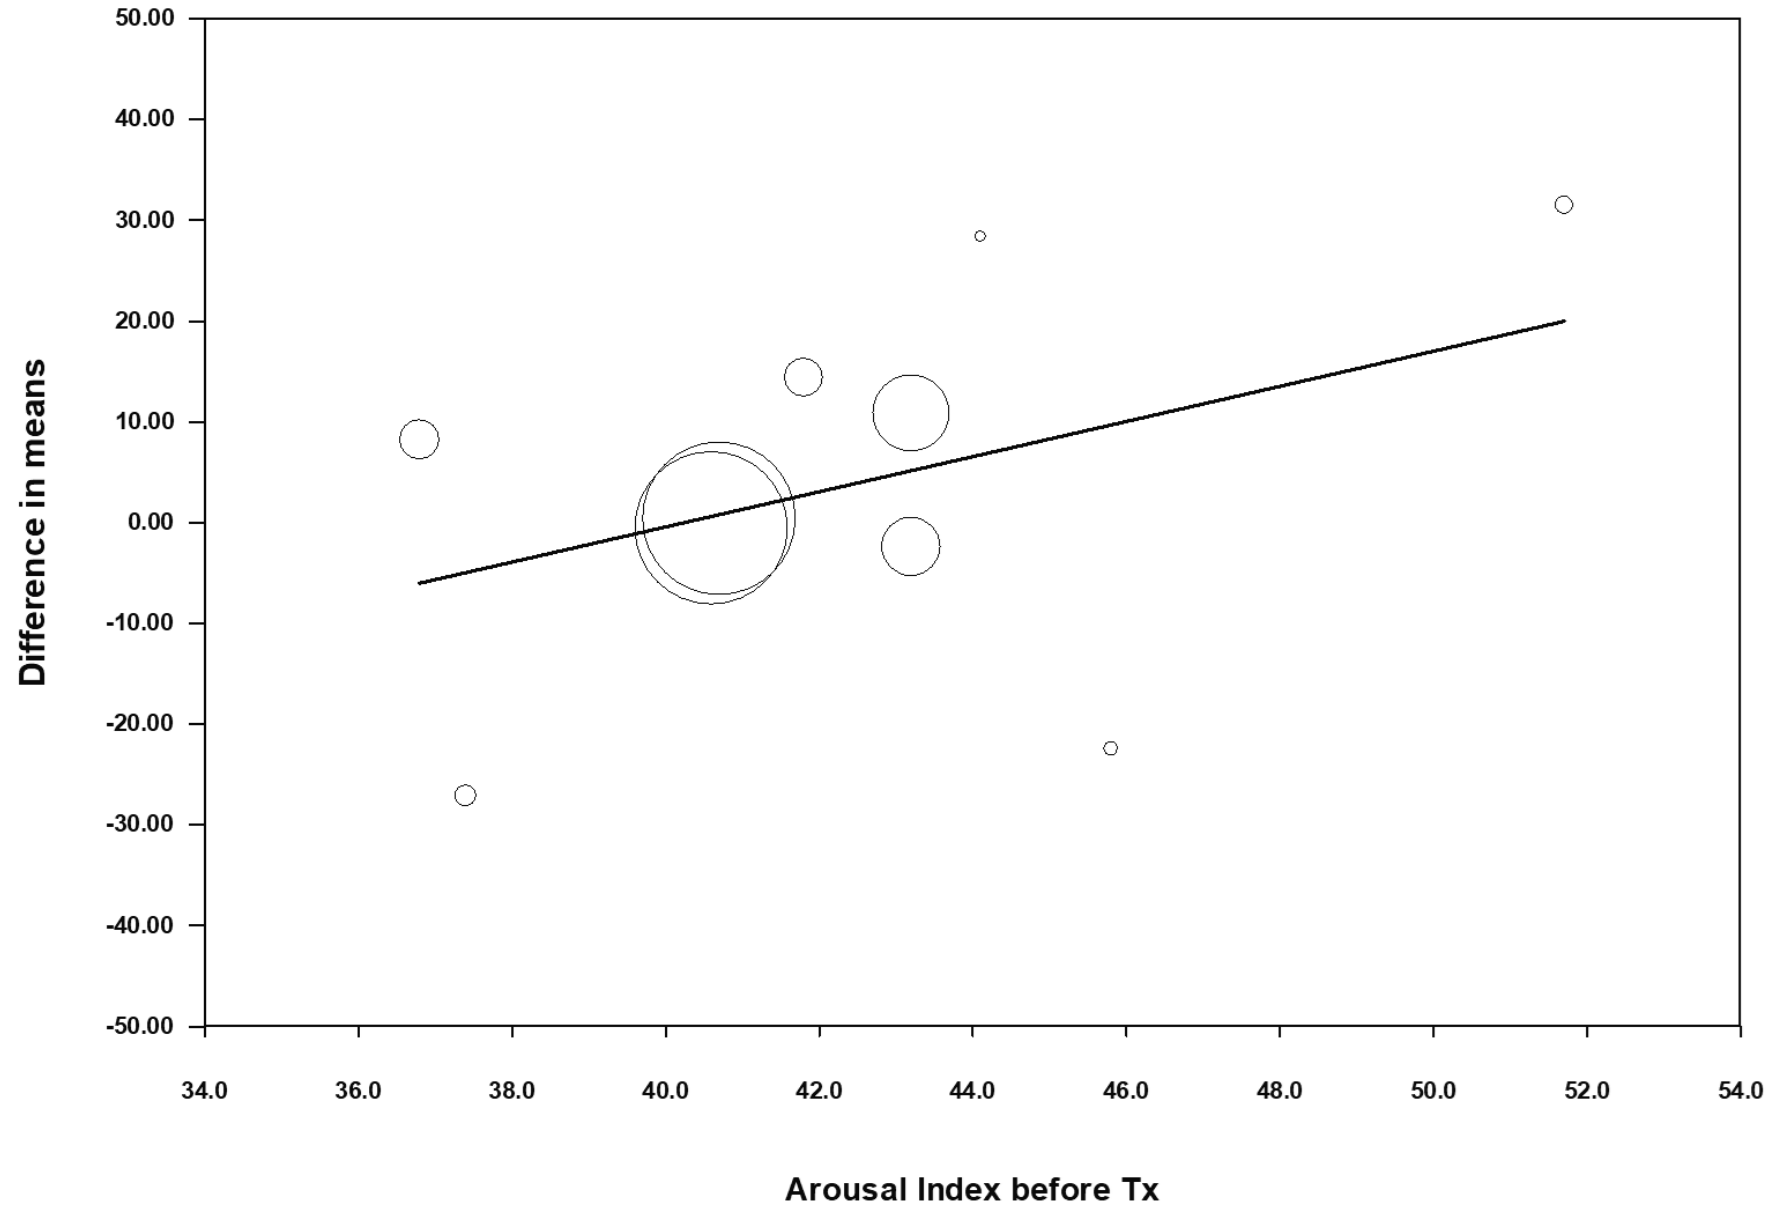

eFigure 1C meta-regression between changes of PLMI and baseline arousal index

# Regression of Difference in means on mean age

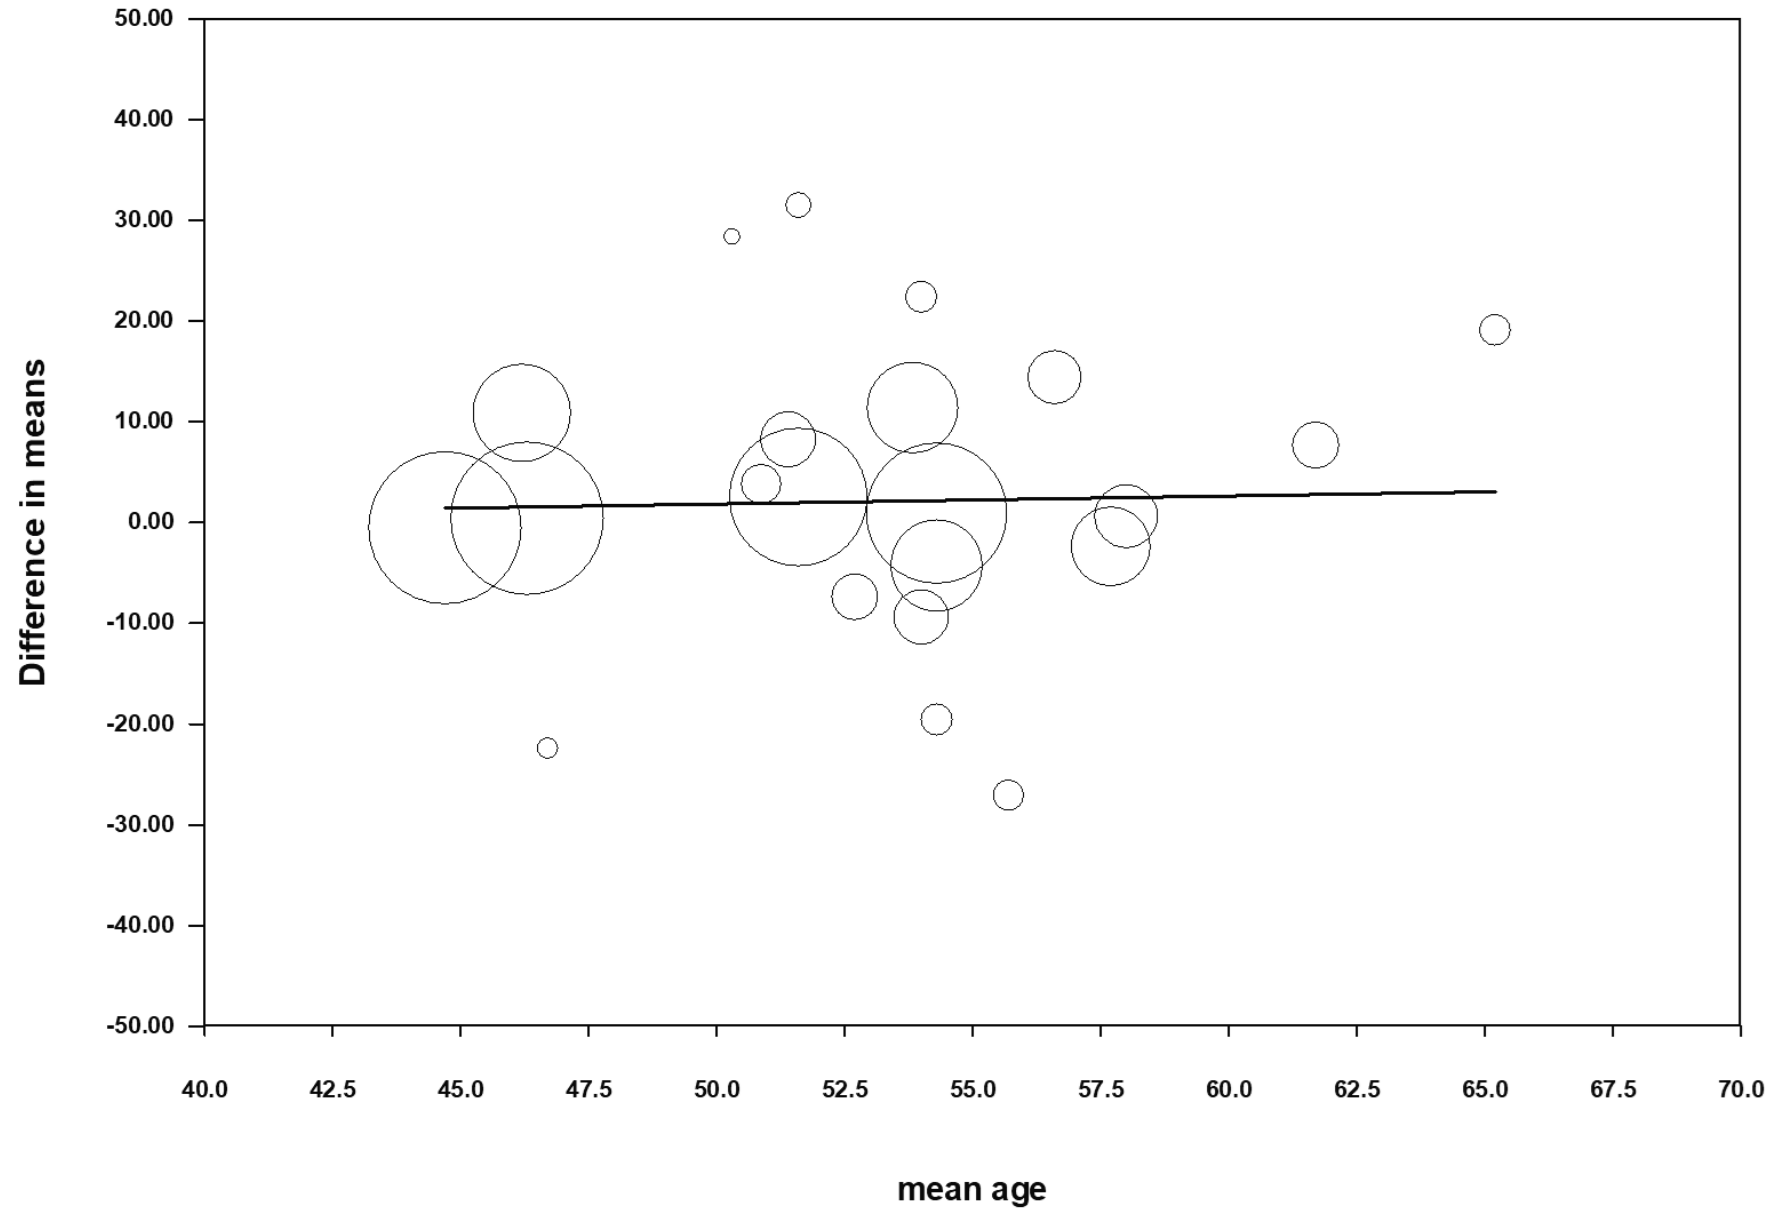

eFigure 1D meta-regression between changes of PLMI and mean age

# Regression of Difference in means on mean BMI

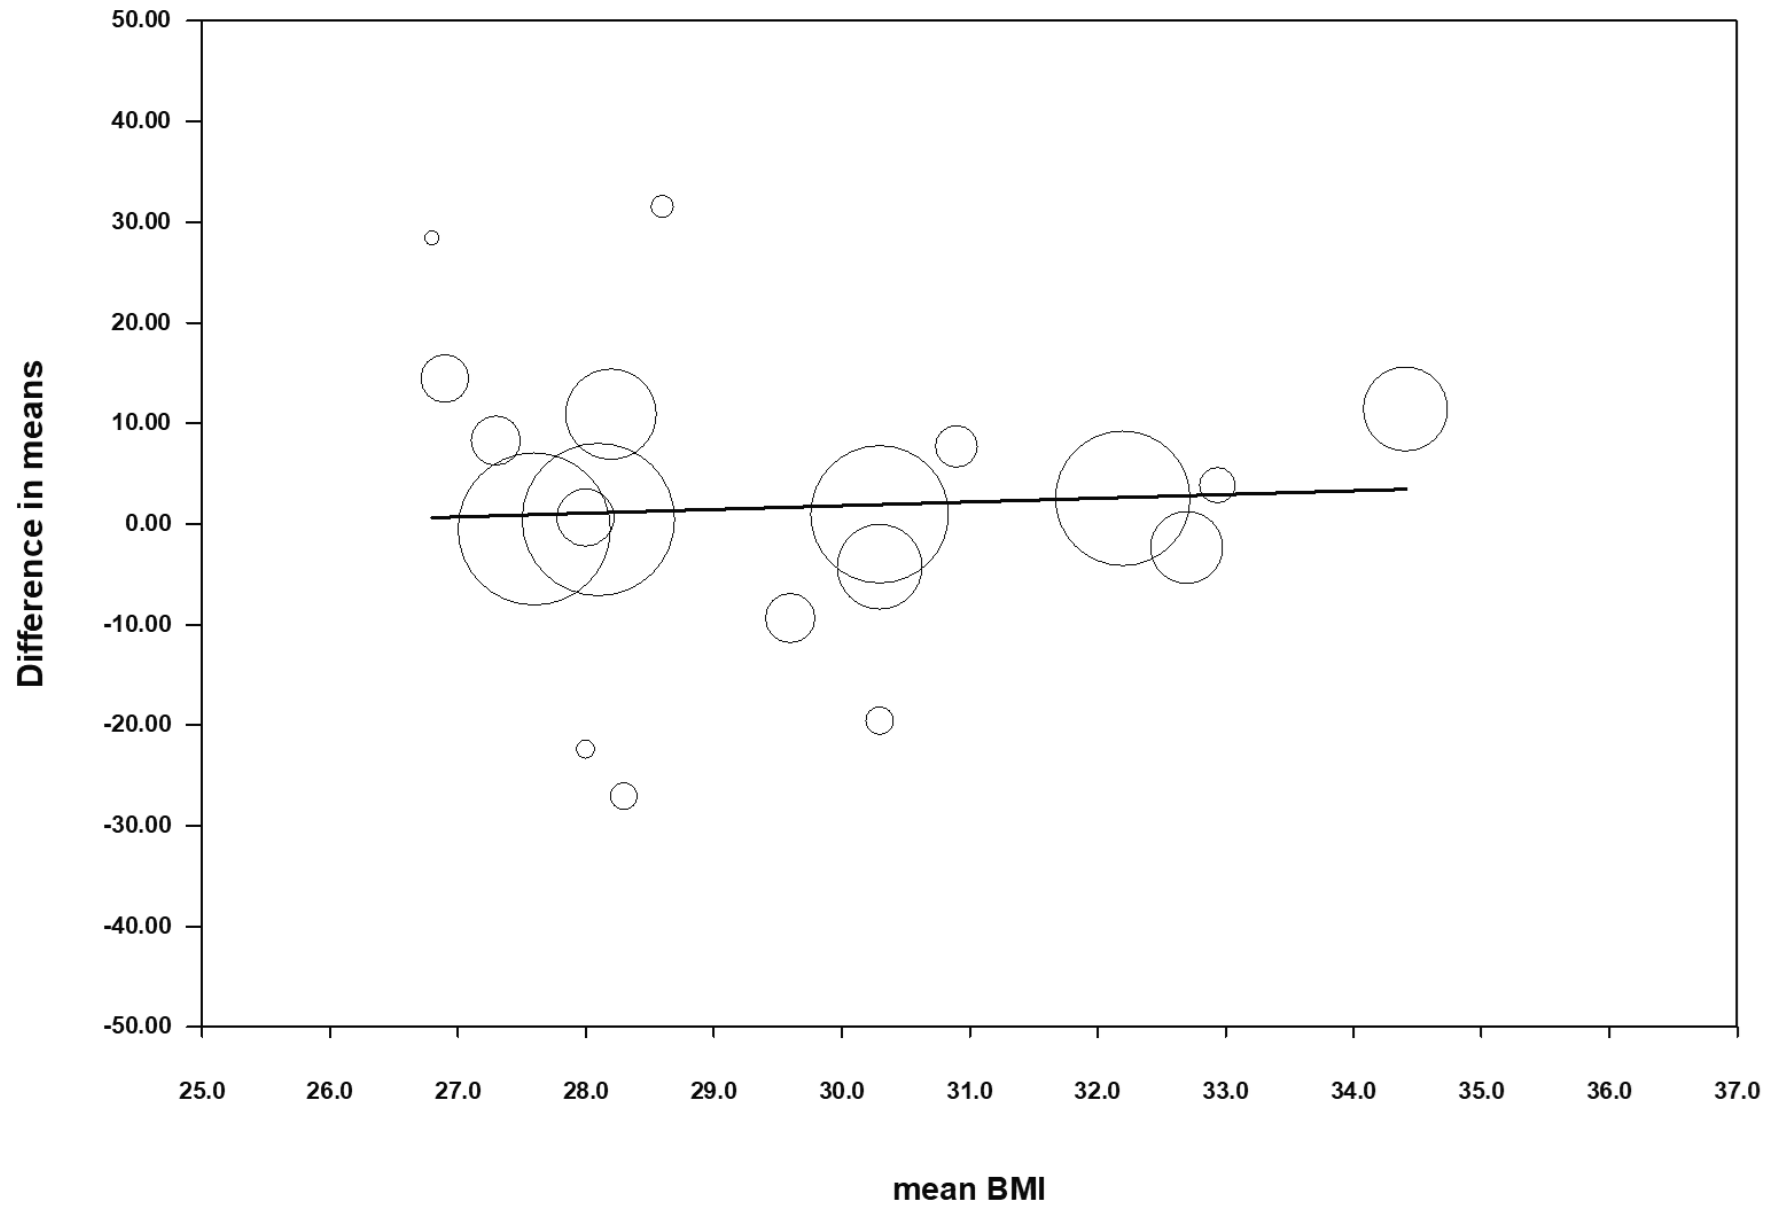

eFigure 1E meta-regression between changes of PLMI and mean BMI

**Funnel Plot of Standard Error by Difference in means**

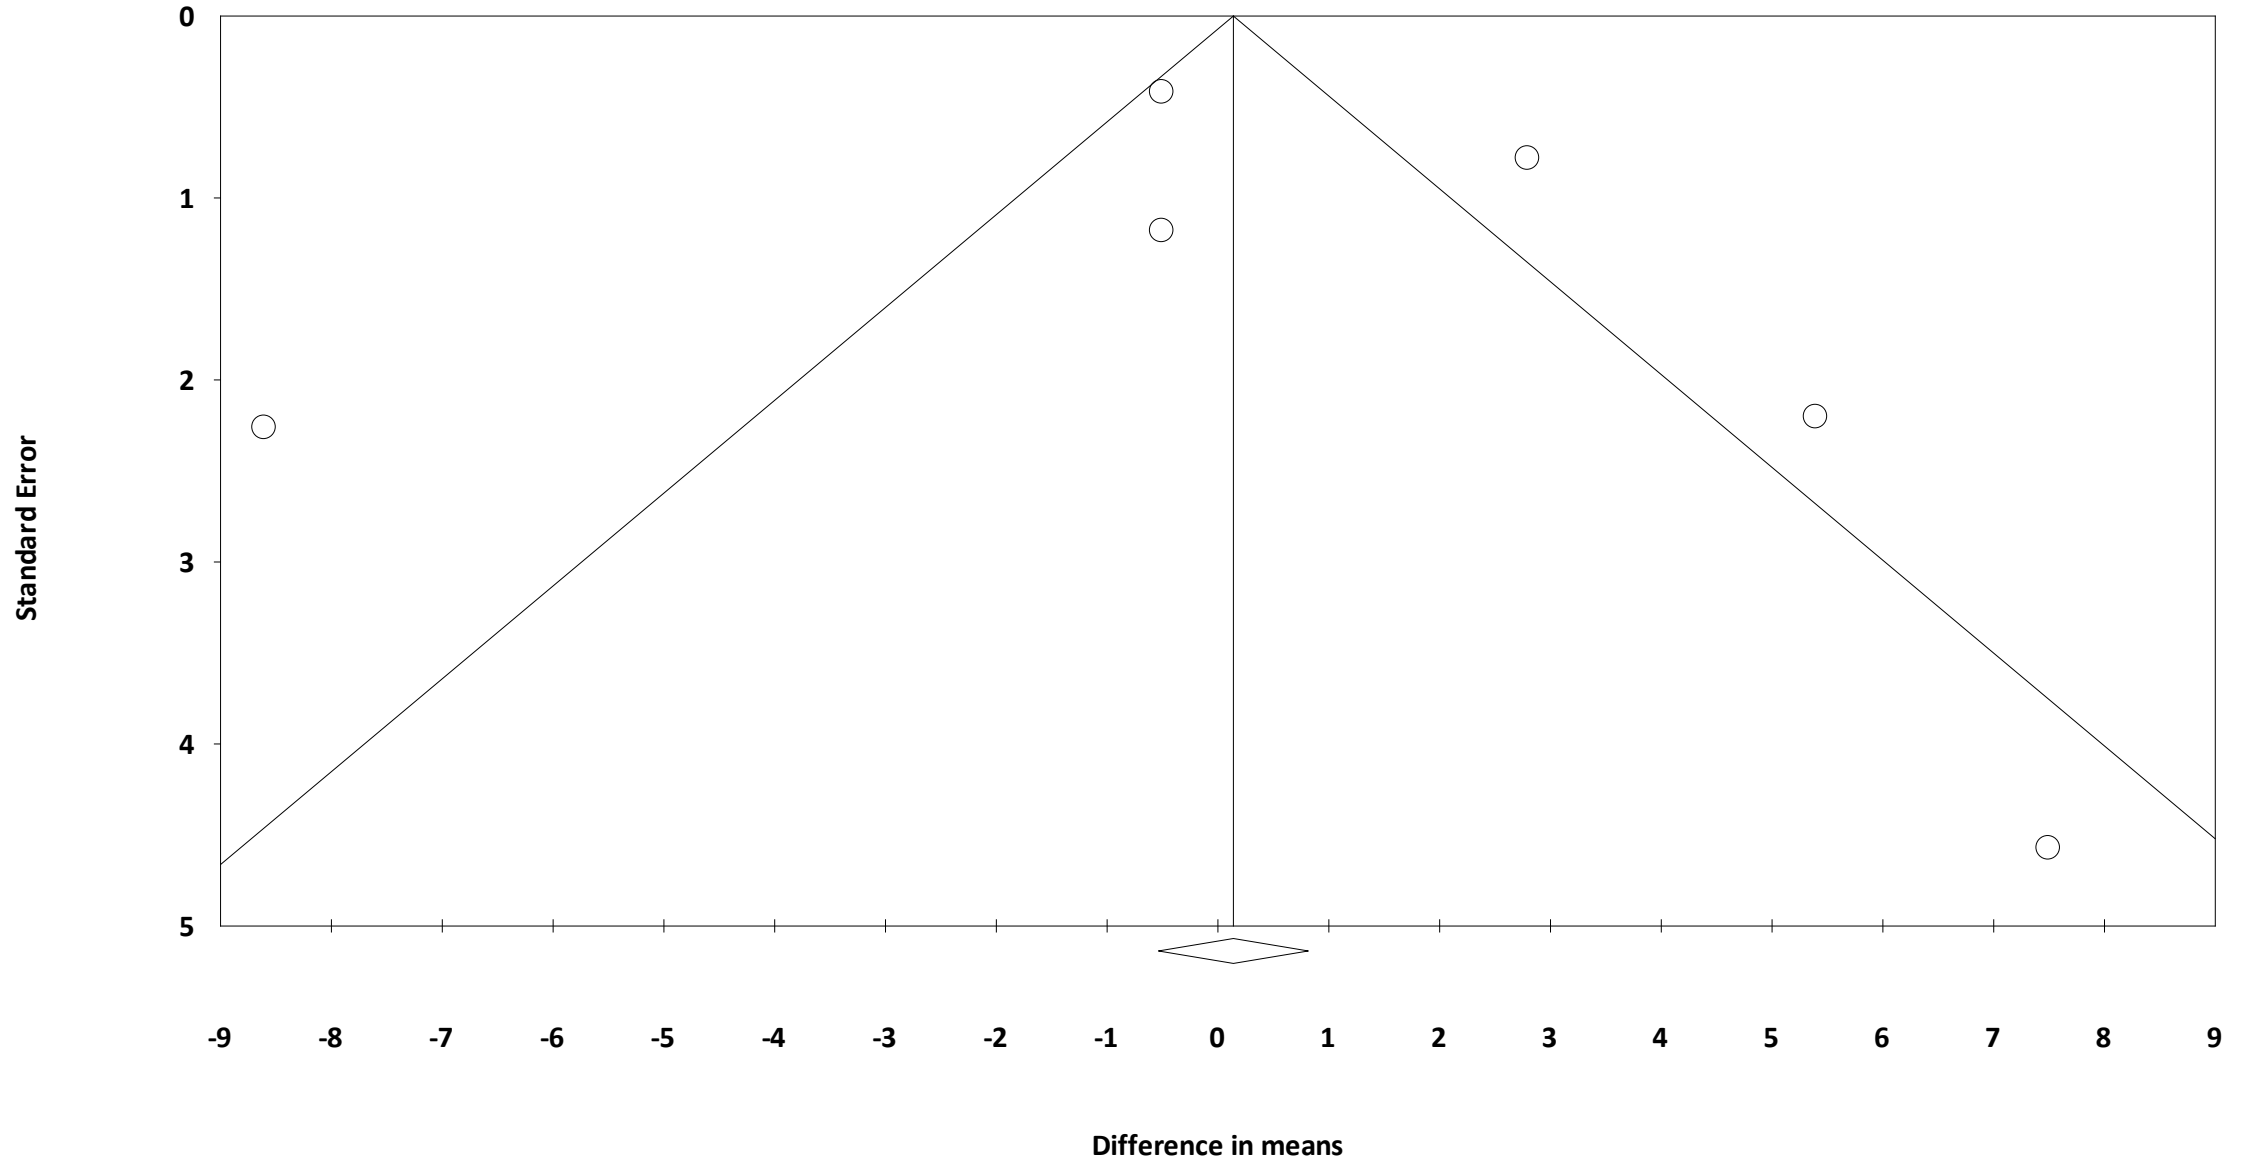

**eFigure 2 Funnel plot of changes of PLMAI before and after CPAP administration**
